# Supplementary material
Source: Springer Nature journal article supplement (https://www.springermedizin.de/resource/supplementary/12885_2012_3377_MOESM1_ESM.pdf/9463354)
Supplement: MOESM1 [file 9463354]

### Additional file 1 – Supplementary table 1.

Coefficients, standard errors, odds ratios and confidence intervals of miR-99a/miR-100/miR-199b miRNA signature (backward regression model).

|                |          | Coefficient | SE    | p     | OR    | 95% CI        |
|----------------|----------|-------------|-------|-------|-------|---------------|
| b <sub>1</sub> | miR-99a  | -1.011      | 0.417 | 0.015 | 0.364 | 0.161 – 0.824 |
| b <sub>2</sub> | miR-100  | 1.047       | 0.492 | 0.033 | 2.849 | 1.087 – 7.467 |
| b <sub>3</sub> | miR-199b | -0.399      | 0.138 | 0.004 | 0.671 | 0.512 – 0.879 |
| b <sub>0</sub> | constant | 2.602       |       |       |       |               |
